# Supplementary material
Source: MDPI journal article supplement (https://www.mdpi.com/2079-6412/10/3/238)
Supplement: s1 [file s1]

# Supplementary Materials: Cu-MoS<sub>2</sub> Superhydrophobic Coating by Composite Electrodeposition

Lucia Helena Prado and Sannakaisa Virtanen\*

Institute for Surface Science and Corrosion, Department of Materials Science and Engineering, University of Erlangen-Nuremberg, Germany; lucia.prado@fau.de

\* Correspondence: virtanen@ww.uni-erlangen.de; Tel.: +49-9131-852-7577 (S.V.)

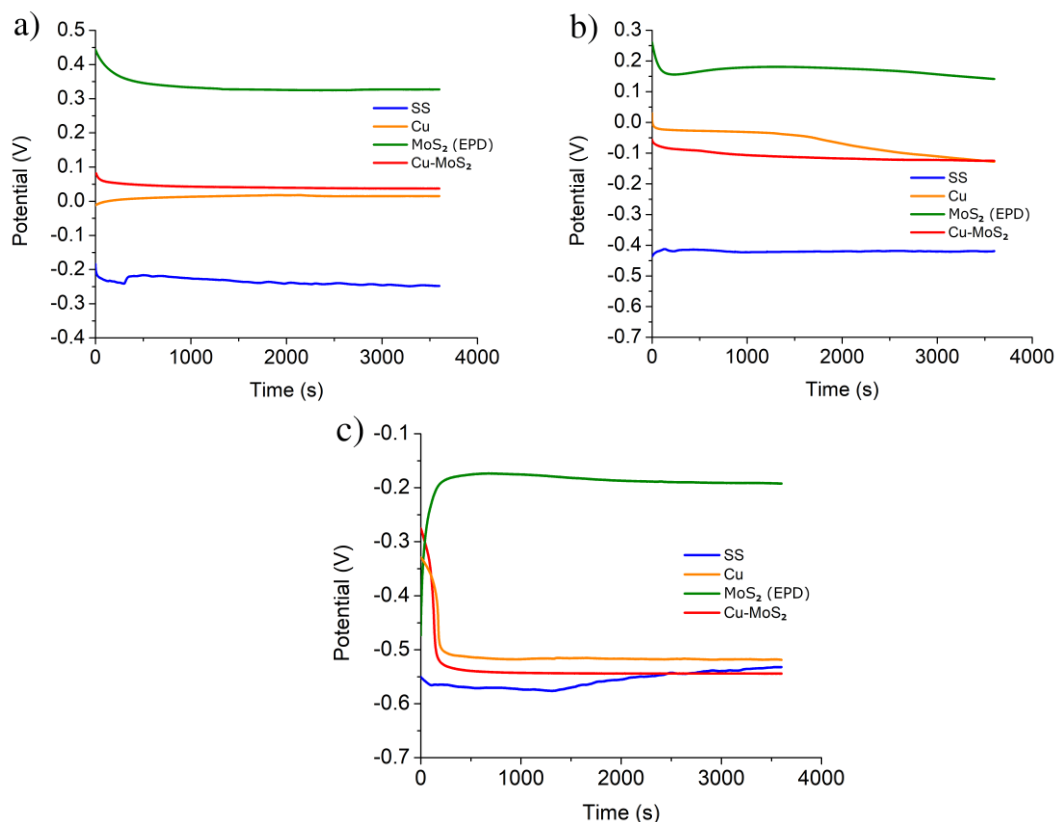

**Figure S1.** Open circuit potential measurements in (a) 0.1 M H<sub>2</sub>SO<sub>4</sub>, (b) 0.1 M NaCl, (c) 0.1 M NaOH.

Contact angle obtained with different parameters. All samples were fabricated following the procedure described in the paper. Contact angles were measured with a Drop Shape Analyzer Krüss DSA30 depositing a 3  $\mu$ L distilled water droplet in the center of the sample to avoid border effect in five different locations. Finally, the mean value and standard error were calculated for each sample.

**Table S1.** Contact angle of different samples.

| MoS <sub>2</sub> g/L | Time (Minutes) | Current density (mA/cm <sup>2</sup> ) | Temperature | CA (Deg) | $\sigma_{CA}$ |
|----------------------|----------------|---------------------------------------|-------------|----------|---------------|
| 2,5                  | 1              | 50                                    | Ambient     | 93.2     | 4.1           |
| 2.5                  | 2              |                                       |             | 80.2     | 3.4           |
| 2.5                  | 3              |                                       |             | 139.2    | 4.7           |

|    |   |    |  |       |     |
|----|---|----|--|-------|-----|
| 15 | 1 | 50 |  | 141.8 | 5.8 |
| 15 | 2 |    |  | 77.5  | 9.7 |
| 15 | 3 |    |  | 83.0  | 4.9 |
| 10 | 1 | 40 |  | 99.7  | 8.2 |
| 10 | 2 |    |  | 102.2 | 4.1 |
| 10 | 3 |    |  | 157.8 | 1.2 |
| 10 | 1 | 50 |  | 153.6 | 2.6 |
| 10 | 2 |    |  | 166.0 | 3.1 |
| 10 | 3 |    |  | 151.7 | 2.0 |
| 10 | 5 |    |  | 152.4 | 5.9 |
| 10 | 2 | 60 |  | 143.6 | 5.8 |
| 10 | 3 |    |  | 153.3 | 3.2 |
| 15 | 2 | 40 |  | 155.2 | 4.4 |
| 15 | 3 |    |  | 149.5 | 2.7 |
| 15 | 2 | 50 |  | 159.3 | 3.9 |
| 15 | 3 |    |  | 155.2 | 3.1 |
| 15 | 1 | 60 |  | 143.6 | 5.9 |
| 15 | 3 |    |  | 152.6 | 1.6 |
| 20 | 3 | 40 |  | 161.1 | 1.4 |
| 20 | 3 | 50 |  | 157.1 | 2.1 |
| 20 | 1 | 60 |  | 80.3  | 6.0 |
| 20 | 3 |    |  | 128.2 | 5.9 |
